# Supplementary material for: XPS and quantum chemical analysis of 4Me-BODIPY derivatives
Source: Royal Society of Chemistry journal article supplement (doi:10.1039/d2cp04541a), 2023-01-01
Supplement: d2cp04541a1.pdf [file d2cp04541a1.pdf]

## XPS and quantum chemical analysis of 4Me-BODIPY derivatives

Sergey A. Tikhonov <sup>a,b</sup>, Andrey E. Sidorin <sup>b</sup>, Alexander A. Ksenofontov <sup>c</sup>, Denis Yu. Kosyanov <sup>b,d</sup>, Ilya S. Samoilov <sup>e</sup>, Anna D. Skitnevskaya <sup>f</sup>, Alexander B. Trofimov <sup>f,g</sup>, Elena V. Antina <sup>c</sup>, Mikhail B. Berezin <sup>c</sup>, Vitaliy I. Vovna <sup>b</sup>

<sup>a</sup> Kamchatka Branch of the Geophysical Survey of the Russian Academy of Sciences, Petropavlovsk-Kamchatsky 683023, Russian Federation

<sup>b</sup> Far Eastern Federal University, Vladivostok 690922, Russian Federation

<sup>c</sup> G.A. Krestov Institute of Solution Chemistry of the Russian Academy of Sciences, Ivanovo 153045, Russian Federation

<sup>d</sup> Institute of Automation and Control Processes, Far Eastern Branch, Russian Academy of Sciences, Vladivostok 690041, Russian Federation

<sup>e</sup> Saint Petersburg State University, Department of Photonics, St. Petersburg 199034, Russian Federation

<sup>f</sup> Irkutsk State University, Laboratory of Quantum Chemistry, Irkutsk 664003, Russian Federation

<sup>g</sup> Favorsky Irkutsk Institute of Chemistry, Siberian Branch of the Russian Academy of Sciences, Irkutsk 664033, Russian Federation

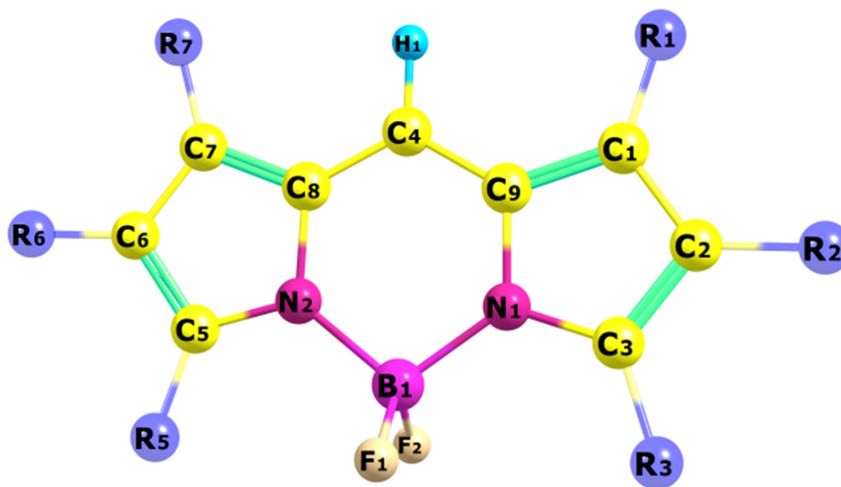

Fig. S1. Chemical structure of compounds II-V.

IV

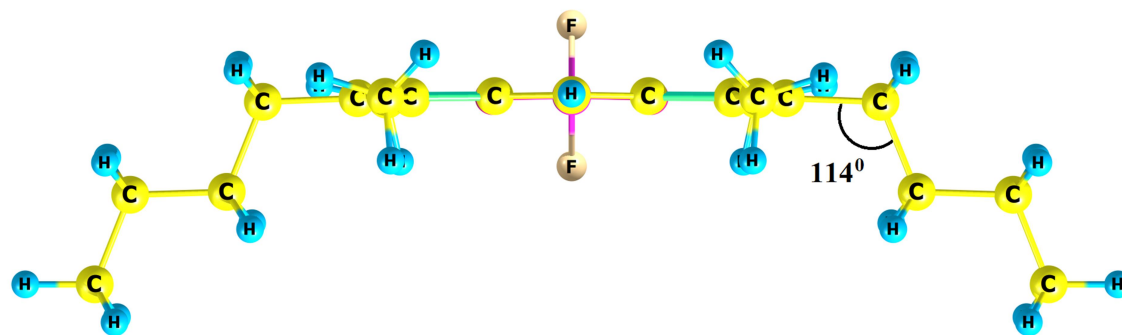

V

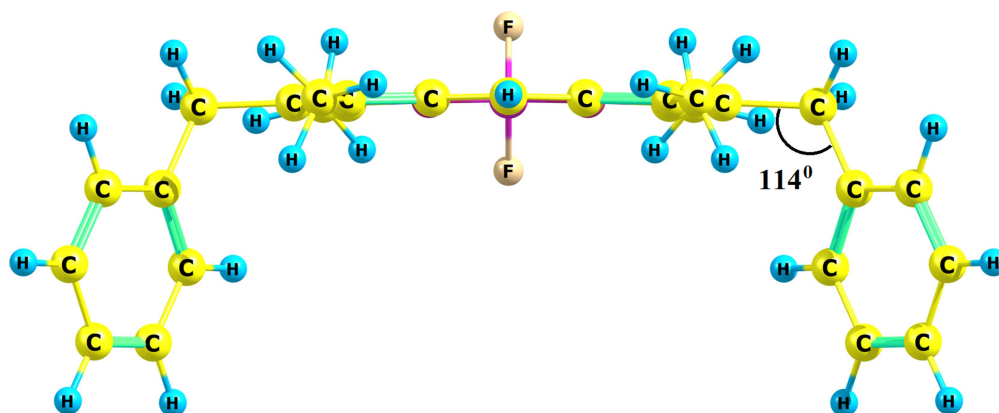

Fig. S2. Chemical structure of compounds IV and V.

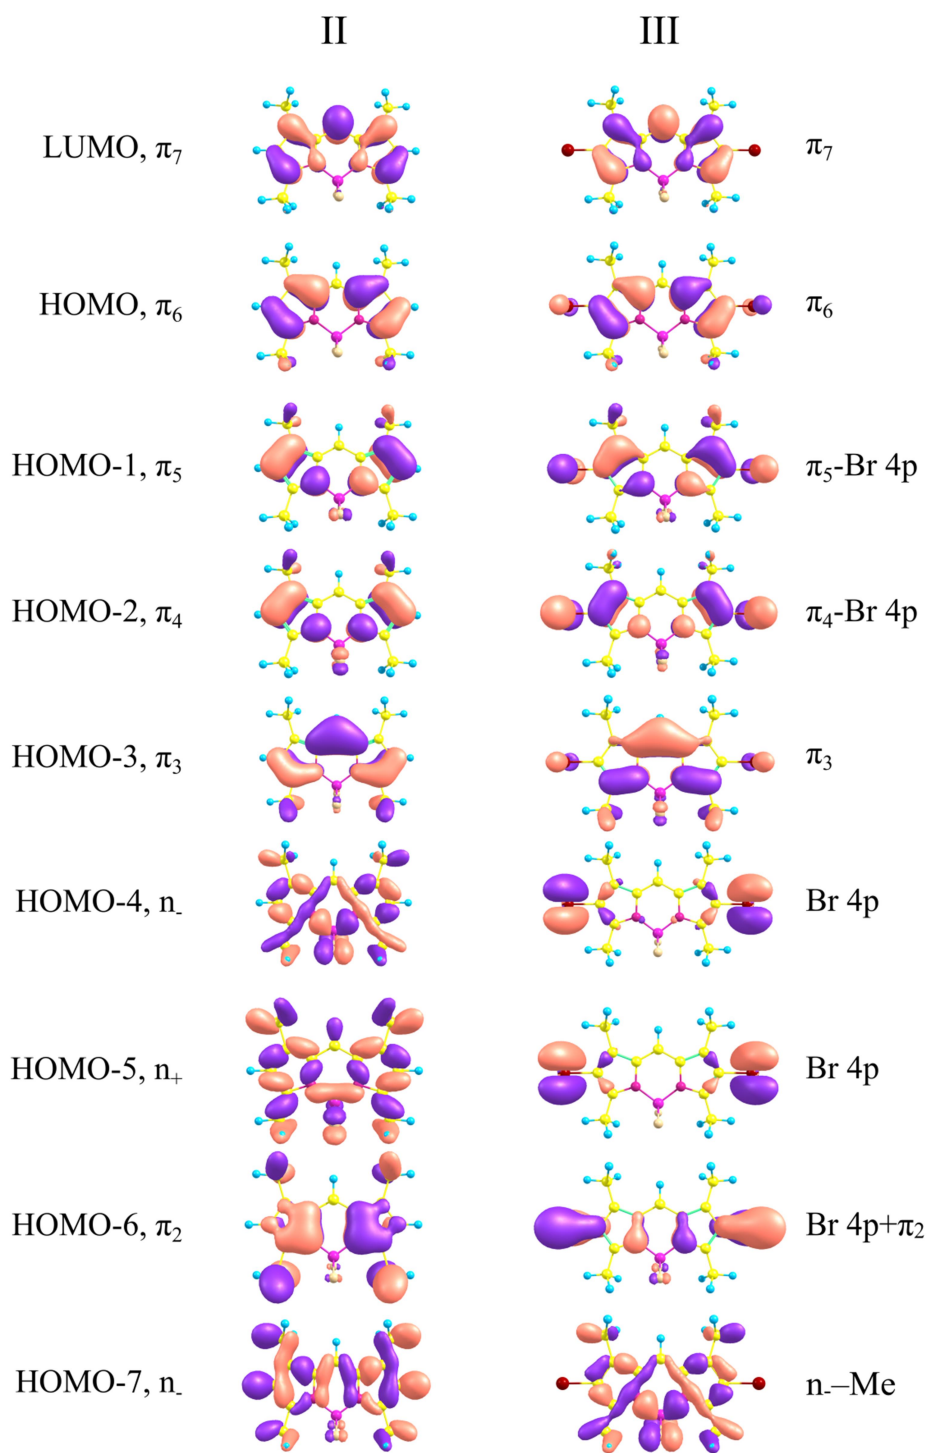

Fig. S3. Molecular orbitals of compounds II and III.

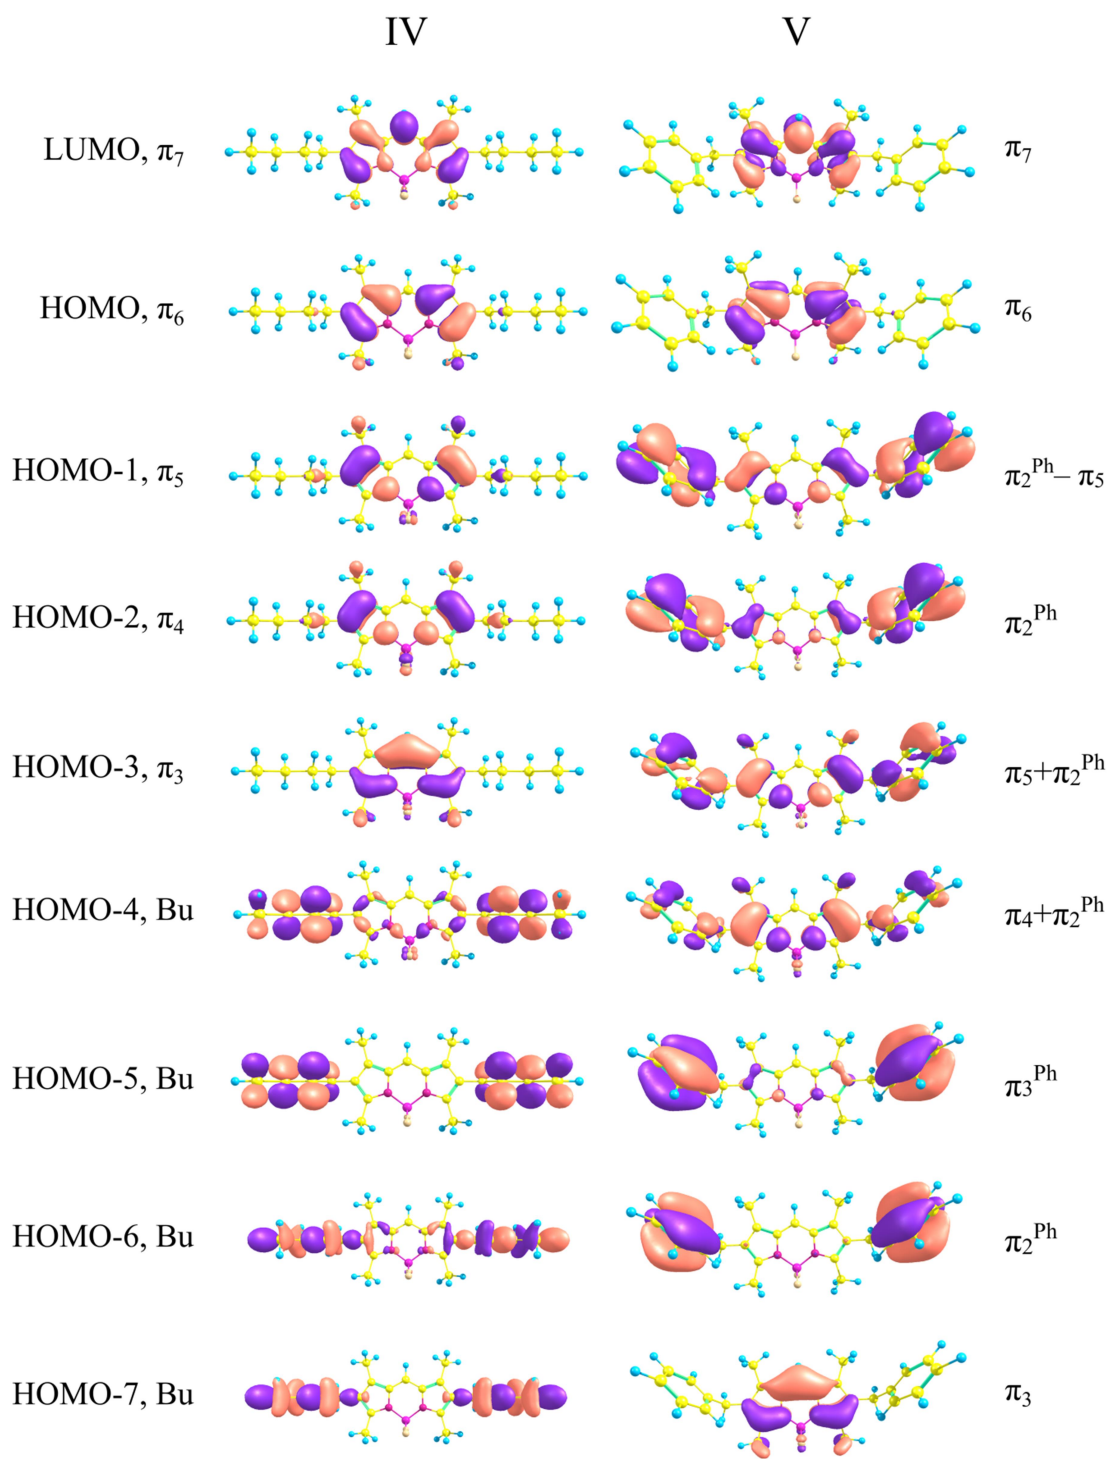

Fig. S4. Molecular orbitals of compounds IV and V.

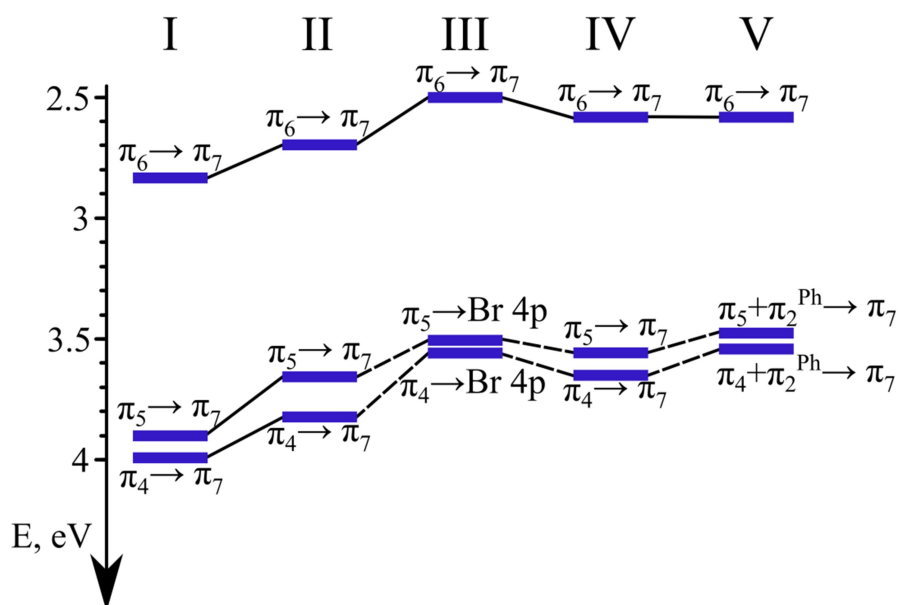

**Fig. S5.** Correlation diagram of excited states of compounds I–V.

**Table S1**

Vertical ionization energies  $I_n$  (eV) and pole strengths  $f$  (a.u.) of the BODIPY core outer valence MOs computed at OVGf level of theory using different basis sets. The vertical electron attachment energy and the corresponding pole strength for the lowest unoccupied MO,  $7b_1$  ( $\pi_7^*$ ), is also included.

| Molecular orbital               | cc-pVDZ |      | aug-cc-pVDZ |      | cc-pVTZ |      |
|---------------------------------|---------|------|-------------|------|---------|------|
|                                 | $I_n$   | $f$  | $I_n$       | $f$  | $I_n$   | $f$  |
| L, $\pi_7$ ( $7b_1$ )           | 0.92    | 0.89 | 1.27        | 0.89 | 1.20    | 0.89 |
| H, $\pi_6$ ( $4a_2$ )           | 7.62    | 0.88 | 7.83        | 0.88 | 7.84    | 0.88 |
| H–1, $\pi_5$ ( $3a_2$ )         | 9.20    | 0.86 | 9.40        | 0.85 | 9.42    | 0.85 |
| H–2, $\pi_4$ ( $6b_1$ )         | 9.40    | 0.85 | 9.61        | 0.84 | 9.62    | 0.84 |
| H–3, $\pi_3$ ( $5b_1$ )         | 10.32   | 0.81 | 10.51       | 0.80 | 10.51   | 0.80 |
| H–4, n. ( $11b_2$ )             | 12.15   | 0.89 | 12.45       | 0.88 | 12.42   | 0.88 |
| H–5, n <sub>+</sub> ( $14a_1$ ) | 12.96   | 0.88 | 13.22       | 0.87 | 13.20   | 0.87 |
| H–7, $\pi_2$ ( $2a_2$ )         | 13.22   | 0.80 | 13.48       | 0.77 | 13.49   | 0.78 |
| H–6, n. ( $10b_2$ )             | 13.31   | 0.87 | 13.49       | 0.87 | 13.45   | 0.87 |

**Table S2**

Energies E (eV) and oscillator strength  $f$  (a.u.) of vertical singlet excitations of the BODIPY I, calculated using ADC(2) and different basis sets.

| Excitation | cc-pVDZ |      | aug-cc-pVDZ |      | cc-pVTZ |      |
|------------|---------|------|-------------|------|---------|------|
|            | E       | $f$  | E           | $f$  | E       | $f$  |
| $1^1B_2$   | 2.83    | 0.50 | 2.76        | 0.50 | 2.77    | 0.49 |
| $2^1B_2$   | 3.85    | 0.23 | 3.77        | 0.21 | 3.78    | 0.21 |
| $2^1A_1$   | 3.95    | 0.04 | 3.88        | 0.04 | 3.89    | 0.04 |
| $3^1A_1$   | 5.41    | 0.07 | 5.31        | 0.06 | 5.30    | 0.07 |

**Table S3**

Energies (eV) of vertical singlet excitations of the BODIPY I obtained at the ADC(2)/cc-pVDZ level in the gas phase and considering solvation within different solvents using SS(V)PE continuum solvation model compared with experiment [81].

| Excitation            | Gas phase | Chloroform           | Cyclohexane          | THF                  | Ethanol              | H <sub>2</sub> O | H <sub>2</sub> O <sup>a</sup> | DMSO | DMSO <sup>a</sup> |
|-----------------------|-----------|----------------------|----------------------|----------------------|----------------------|------------------|-------------------------------|------|-------------------|
| $1^1B_{2\text{expl}}$ |           | 2.46 <sup>[81]</sup> | 2.46 <sup>[81]</sup> | 2.48 <sup>[81]</sup> | 2.49 <sup>[81]</sup> |                  |                               |      |                   |
| $1^1B_2$              | 2,83      | 2.83                 | 2,84                 | 2,86                 | 2,87                 | 2,87             | 2,84                          | 2,87 | 2,84              |
| $2^1B_2$              | 3,85      | 3.89                 | 3,89                 | 3,92                 | 3,94                 | 3,94             | 3,88                          | 3,94 | 3,89              |
| $2^1A_1$              | 3,95      | 3.99                 | 4,00                 | 4,04                 | 4,06                 | 4,06             | 4,01                          | 4,06 | 4,01              |
| $3^1A_1$              | 5,41      | 5.42                 | 5,42                 | 5,44                 | 5,44                 | 5,44             | 5,40                          | 5,44 | 5,41              |

<sup>a</sup> calculations with geometrical parameters pre-optimized accounting for solvation effects at the SS(V)PE level.

**Table S4**

Geometric parameters of compounds I-V in the  $S_0$  ground state <sup>a</sup> and  $S_1$  excited state <sup>b</sup>.

| Compound | Chemical bond, Å               |       |                                |       |                                |       |                                |       |                                |       |                                |       |                                |       |
|----------|--------------------------------|-------|--------------------------------|-------|--------------------------------|-------|--------------------------------|-------|--------------------------------|-------|--------------------------------|-------|--------------------------------|-------|
|          | F <sub>1</sub> -B <sub>1</sub> |       | B <sub>1</sub> -N <sub>1</sub> |       | N <sub>1</sub> -C <sub>9</sub> |       | C <sub>9</sub> -C <sub>4</sub> |       | C <sub>1</sub> -R <sub>1</sub> |       | C <sub>3</sub> -R <sub>3</sub> |       | C <sub>2</sub> -R <sub>2</sub> |       |
|          | $S_0$                          | $S_1$ |
| I        | 1.38                           | 1.38  | 1.58                           | 1.54  | 1.39                           | 1.41  | 1.40                           | 1.38  | 1.09                           | 1.09  | 1.09                           | 1.09  | 1.09                           | 1.09  |
| II       | 1.39                           | 1.40  | 1.57                           | 1.56  | 1.40                           | 1.41  | 1.39                           | 1.41  | 1.50                           | 1.50  | 1.49                           | 1.50  | 1.09                           | 1.09  |
| III      | 1.39                           | 1.40  | 1.57                           | 1.56  | 1.39                           | 1.41  | 1.39                           | 1.41  | 1.50                           | 1.49  | 1.49                           | 1.49  | 1.89                           | 1.87  |
| IV       | 1.39                           | 1.39  | 1.57                           | 1.57  | 1.39                           | 1.39  | 1.39                           | 1.39  | 1.50                           | 1.50  | 1.50                           | 1.50  | 1.50                           | 1.50  |
| V        | 1.39                           | 1.40  | 1.57                           | 1.55  | 1.39                           | 1.42  | 1.39                           | 1.41  | 1.50                           | 1.50  | 1.50                           | 1.49  | 1.51                           | 1.50  |

<sup>a</sup> The equilibrium  $S_0$  geometry was computed using DFT/CAM-B3LYP/Def2-SVP approach.

<sup>b</sup> The equilibrium  $S_1$  geometry was computed using TD-DFT/CAM-B3LYP/Def2-SVP approach.

**Table S5**Relative photoionization cross sections  $\sigma$  [86] for the radiation source  $\text{MgK}\alpha$  ( $h\nu = 1253.6$  eV).

| Atom | 2p    | 2s    |
|------|-------|-------|
| C    | 1.0   | 66.0  |
| N    | 7.2   | 110.0 |
| F    | 68.0  | 280.0 |
| B    | 0.2   | 28.0  |
|      | 4p    | -     |
| Br   | 450.0 | -     |
|      | -     | 1s    |
| H    | -     | 0.2   |

**Table S6**

Localization (Mulliken populations according to the CAM-B3LYP method) and calculated energies of some lower valence MOs of the compound II which correspond to maxima 2-5 in the X-ray photoelectron spectra.

| Peak. | MO                   | $-\epsilon_i$ eV | Localization (%) |         |         |          |
|-------|----------------------|------------------|------------------|---------|---------|----------|
|       |                      |                  | C 2s/2p          | N 2s/2p | F 2s/2p | Br 4s/4p |
| 2     | 67, 11a <sub>1</sub> | 15.88            | 5/48             | 1/2     | 2/26    | 0/2      |
|       | 66, 8b <sub>1</sub>  | 16.08            | 11/38            | 1/16    | 0/5     | 6/11     |
|       | 65, 7b <sub>1</sub>  | 16.99            | 12/49            | 1/24    | 0/1     | 1/1      |
| 2'    | 64, 6b <sub>1</sub>  | 17.69            | 23/52            | 2/5     | 0/2     | 0/1      |
|       | 63, 10a <sub>1</sub> | 17.78            | 13/40            | 1/19    | 2/8     | 0/0      |
|       | 62, 9a <sub>1</sub>  | 18.17            | 20/29            | 0/20    | 1/5     | 9/5      |
|       | 61, 8a <sub>1</sub>  | 19.21            | 40/23            | 0/13    | 0/0     | 0/0      |
| 3     | 60, 5b <sub>1</sub>  | 20.67            | 45/28            | 0/7     | 0/0     | 3/0      |
|       | 59, 4b <sub>1</sub>  | 21.63            | 34/28            | 6/2     | 0/0     | 10/0     |
|       | 58, 7a <sub>1</sub>  | 21.84            | 37/26            | 4/5     | 0/1     | 5/0      |
|       | 57, 6a <sub>1</sub>  | 22.55            | 52/20            | 4/1     | 0/0     | 2/0      |
|       | 56, 3b <sub>1</sub>  | 22.76            | 43/14            | 4/4     | 0/0     | 20/0     |
|       | 55, 5a <sub>1</sub>  | 23.44            | 27/17            | 1/3     | 0/0     | 45/0     |
|       | 54, 3b <sub>1</sub>  | 24.09            | 56/12            | 0/4     | 0/0     | 19/0     |
|       | 53, 4a <sub>1</sub>  | 25.01            | 71/7             | 6/6     | 0/0     | 1/0      |
|       | 52, 2b <sub>1</sub>  | 25.12            | 41/7             | 10/0    | 0/0     | 35/2     |
|       | 51, 3a <sub>1</sub>  | 25.36            | 50/7             | 5/3     | 0/0     | 29/2     |
| 4     | 50, 1b <sub>1</sub>  | 29.29            | 42/5             | 45/4    | 0/0     | 0/0      |
|       | 49, 2a <sub>1</sub>  | 29.71            | 39/7             | 47/3    | 1/0     | 0/0      |
| 5     | 48, 1b <sub>2</sub>  | 33.06            | 0/0              | 0/0     | 88/1    | 0/0      |
|       | 47, 1a <sub>1</sub>  | 33.99            | 0/1              | 1/1     | 85/2    | 0/0      |

**Table S7**

Localization (Mulliken populations according to the CAM-B3LYP method) and calculated energies of some lower valence MOs of the compound III which correspond to maxima 2-5 in the X-ray photoelectron spectra.

| Peak. | MO        | $-\varepsilon_i$ eV | Localization (%) |         |         |
|-------|-----------|---------------------|------------------|---------|---------|
|       |           |                     | C 2s/2p          | N 2s/2p | F 2s/2p |
| 2'    | 36 $8b_1$ | 16.21               | 7/51             | 0/15    | 0/4     |
|       | 35 $7b_1$ | 16.91               | 18/39            | 3/21    | 0/0     |
|       | 34 $6b_1$ | 17.06               | 25/50            | 2/6     | 0/3     |
|       | 33 $9a_1$ | 17.35               | 13/34            | 1/20    | 2/11    |
| 2     | 32 $8a_1$ | 18.50               | 18/33            | 1/23    | 1/3     |
|       | 31 $7a_1$ | 18.81               | 43/25            | 0/8     | 0/0     |
| 3     | 30 $5b_1$ | 20.38               | 46/28            | 2/6     | 0/0     |
|       | 29 $4b_1$ | 21.51               | 44/27            | 3/2     | 0/0     |
|       | 28 $6a_1$ | 21.60               | 44/24            | 3/4     | 0/0     |
|       | 27 $5a_1$ | 22.23               | 54/21            | 4/0     | 0/0     |
|       | 26 $3b_1$ | 22.93               | 61/12            | 6/6     | 0/0     |
|       | 25 $2b_1$ | 24.07               | 65/14            | 9/1     | 0/0     |
|       | 24 $4a_1$ | 24.16               | 62/16            | 9/3     | 0/0     |
|       | 23 $3a_1$ | 24.60               | 74/7             | 3/8     | 0/0     |
| 4     | 22 $1b_1$ | 28.76               | 41/6             | 46/4    | 0/0     |
|       | 21 $2a_1$ | 29.21               | 38/7             | 48/2    | 0/0     |
| 5     | 20 $1b_2$ | 32.69               | 0/0              | 0/0     | 88/1    |
|       | 19 $1a_1$ | 33.63               | 0/0              | 1/1     | 85/2    |



**Table S8**

Localization (Mulliken populations according to the CAM-B3LYP method) and calculated energies of some lower valence MOs of the compound IV which correspond to maxima 2-5 in the X-ray photoelectron spectra.

| Peak. | MO                   | $-\varepsilon_i$ eV | Localization (%) |         |         |
|-------|----------------------|---------------------|------------------|---------|---------|
|       |                      |                     | C 2s/2p          | N 2s/2p | F 2s/2p |
| 2'    | 52, 14a <sub>1</sub> | 15.58               | 4/54             | 0/2     | 1/17    |
|       | 51, 10b <sub>1</sub> | 16.46               | 11/52            | 1/22    | 0/1     |
|       | 50, 9b <sub>1</sub>  | 17.11               | 22/53            | 2/5     | 0/2     |
|       | 49, 13a <sub>1</sub> | 17.18               | 16/55            | 0/10    | 0/1     |
|       | 48, 12a <sub>1</sub> | 17.35               | 16/21            | 1/22    | 2/13    |
|       | 47, 8b <sub>1</sub>  | 17.83               | 28/29            | 0/0     | 0/0     |
|       | 46, 11a <sub>1</sub> | 17.89               | 30/27            | 0/2     | 0/0     |
| 2     | 45, 10a <sub>1</sub> | 18.67               | 39/22            | 0/15    | 0/0     |
|       | 44, 7b <sub>1</sub>  | 19.26               | 42/24            | 1/4     | 0/0     |
|       | 43, 9a <sub>1</sub>  | 19.71               | 42/25            | 1/4     | 0/1     |
|       | 42, 6b <sub>1</sub>  | 20.29               | 46/26            | 1/6     | 0/0     |
| 3     | 41, 5b <sub>1</sub>  | 21.18               | 43/26            | 5/1     | 0/0     |
|       | 40, 8a <sub>1</sub>  | 21.37               | 40/24            | 4/4     | 0/1     |
|       | 39, 4b <sub>1</sub>  | 22.04               | 52/20            | 1/2     | 0/0     |
|       | 38, 7a <sub>1</sub>  | 22.05               | 53/20            | 2/1     | 0/0     |
|       | 37, 6a <sub>1</sub>  | 22.29               | 59/20            | 1/0     | 0/0     |
|       | 36, 3b <sub>1</sub>  | 23.07               | 67/11            | 3/4     | 0/0     |
|       | 35, 5a <sub>1</sub>  | 23.72               | 66/14            | 2/2     | 0/0     |
|       | 34, 2b <sub>1</sub>  | 23.80               | 67/12            | 3/1     | 0/0     |
|       | 33, 4a <sub>1</sub>  | 24.45               | 71/6             | 7/6     | 0/0     |
|       | 32, 1b <sub>1</sub>  | 24.46               | 71/8             | 7/0     | 0/0     |
|       | 31, 3a <sub>1</sub>  | 24.65               | 75/8             | 3/4     | 0/0     |
| 4     | 30, 1b <sub>1</sub>  | 28.65               | 41/6             | 46/4    | 0/0     |
|       | 29, 2a <sub>1</sub>  | 29.10               | 38/7             | 48/2    | 0/0     |
| 5     | 28, 1b <sub>2</sub>  | 32.62               | 0/0              | 0/0     | 88/1    |
|       | 27, 1a <sub>1</sub>  | 33.56               | 0/0              | 1/1     | 85/2    |

**Table S9**

Localization (Mulliken populations according to the CAM-B3LYP method) and calculated energies of some lower valence MOs of the compound V which correspond to maxima 2-5 in the X-ray photoelectron spectra.

| Peak. | MO                           | $-\epsilon_i$ eV | Localization (%) |         |         |
|-------|------------------------------|------------------|------------------|---------|---------|
|       |                              |                  | C 2s/2p          | N 2s/2p | F 2s/2p |
| 2     | 61, 13 <i>b</i> <sub>1</sub> | 16.56            | 11/52            | 1/22    | 0/1     |
|       | 60, 12 <i>b</i> <sub>1</sub> | 17.18            | 23/52            | 2/4     | 0/2     |
|       | 59, 15 <i>a</i> <sub>1</sub> | 17.23            | 17/55            | 0/9     | 0/1     |
|       | 58, 14 <i>a</i> <sub>1</sub> | 17.42            | 17/26            | 1/20    | 2/12    |
|       | 57, 11 <i>b</i> <sub>1</sub> | 18.01            | 33/47            | 0/1     | 0/0     |
|       | 56, 13 <i>a</i> <sub>1</sub> | 18.28            | 31/46            | 0/7     | 0/1     |
|       | 55, 10 <i>b</i> <sub>1</sub> | 18.53            | 35/44            | 0/0     | 0/0     |
|       | 54, 12 <i>a</i> <sub>1</sub> | 18.55            | 34/43            | 0/2     | 0/0     |
|       | 53, 11 <i>a</i> <sub>1</sub> | 18.78            | 42/24            | 0/12    | 0/0     |
| 3     | 52, 9 <i>b</i> <sub>1</sub>  | 20.13            | 46/31            | 0/7     | 0/0     |
|       | 51, 8 <i>b</i> <sub>1</sub>  | 20.72            | 42/29            | 6/2     | 0/0     |
|       | 50, 10 <i>a</i> <sub>1</sub> | 20.93            | 42/30            | 3/5     | 0/1     |
|       | 49, 9 <i>a</i> <sub>1</sub>  | 21.69            | 47/28            | 1/2     | 0/0     |
|       | 48, 7 <i>b</i> <sub>1</sub>  | 21.70            | 48/29            | 0/1     | 0/0     |
|       | 47, 8 <i>a</i> <sub>1</sub>  | 22.25            | 54/21            | 4/0     | 0/0     |
|       | 46, 6 <i>b</i> <sub>1</sub>  | 22.48            | 67/20            | 0/0     | 0/0     |
|       | 45, 7 <i>a</i> <sub>1</sub>  | 22.49            | 67/20            | 0/0     | 0/0     |
|       | 44, 5 <i>b</i> <sub>1</sub>  | 22.73            | 64/16            | 4/3     | 0/0     |
|       | 43, 6 <i>a</i> <sub>1</sub>  | 23.16            | 65/21            | 1/2     | 0/0     |
|       | 42, 4 <i>b</i> <sub>1</sub>  | 23.56            | 70/15            | 0/3     | 0/0     |
|       | 41, 3 <i>b</i> <sub>1</sub>  | 24.35            | 69/12            | 9/0     | 0/0     |
|       | 40, 5 <i>a</i> <sub>1</sub>  | 24.49            | 68/10            | 11/2    | 0/0     |
|       | 39, 4 <i>a</i> <sub>1</sub>  | 24.62            | 76/9             | 0/8     | 0/0     |
| 4     | 38, 2 <i>b</i> <sub>1</sub>  | 25.71            | 86/8             | 0/0     | 0/0     |
|       | 37, 3 <i>a</i> <sub>1</sub>  | 25.72            | 86/8             | 0/0     | 0/0     |
|       | 36, 1 <i>b</i> <sub>1</sub>  | 28.72            | 42/6             | 45/4    | 0/0     |
|       | 35, 2 <i>a</i> <sub>1</sub>  | 29.17            | 39/7             | 48/2    | 1/0     |
| 5     | 34, 1 <i>b</i> <sub>2</sub>  | 32.68            | 0/0              | 0/0     | 88/1    |
|       | 33, 1 <i>a</i> <sub>1</sub>  | 33.61            | 0/1              | 1/1     | 85/2    |

**Table S10**

Experimental energies and half-widths of bands in X-ray photoelectron spectra of 1s-Electrons of compounds II-IV.

| Compound,<br>electron<br>levels | II    |                | III   |                | IV    |                | V     |                |
|---------------------------------|-------|----------------|-------|----------------|-------|----------------|-------|----------------|
|                                 | $E_b$ | Half-<br>width | $E_b$ | Half-<br>width | $E_b$ | Half-<br>width | $E_b$ | Half-<br>width |
| F 1s                            | 686.0 | 1.8            | 686.0 | 1.7            | 686.0 | 1.8            | 686.0 | 1.6            |
| N 1s                            | 399.8 | 1.7            | 399.8 | 1.7            | 399.8 | 2.2            | 399.9 | 1.4            |
| C 1s                            | 285.4 | 1.9            | 285.3 | 1.9            | 285.5 | 1.6            | 285.5 | 1.4            |
| B 1s                            | 193.3 | 1.9            | 193.5 | 1.5            | 193.4 | 1.7            | 193.4 | 1.3            |
| Br 3p 3/2                       | -     | -              | 191.1 | 2.6            | -     | -              | -     | -              |
| Br 3p 1/2                       | -     | -              | 184.6 | 2.6            | -     | -              | -     | -              |
| Br 3d                           | -     | -              | 71.4  | 2.0            | -     | -              | -     | -              |

**Table S11**

Differences in the calculated energy intervals (eV) between  $I_l-I_n$ , in comparison with the OVGf method data ( $\Delta$ OVGF).

| Energy    | $\Delta$ OVGF |           |               |
|-----------|---------------|-----------|---------------|
|           | BHLYP         | CAM-B3LYP | $\omega$ B97X |
| I         |               |           |               |
| $I_2-I_1$ | 0.01          | -0.09     | 0.09          |
| $I_3-I_1$ | 0.01          | -0.10     | 0.08          |
| $I_4-I_1$ | 0.08          | 0.07      | 0.28          |
| $I_5-I_1$ | -0.12         | -0.89     | -0.72         |
| $I_6-I_1$ | -0.21         | -1.00     | -0.83         |
| $I_7-I_1$ | -0.14         | -1.14     | 0.97          |
| $I_8-I_1$ | -0.03         | -0.52     | -0.35         |
| II        |               |           |               |
| $I_2-I_1$ | 0.03          | -0.09     | 0.09          |
| $I_3-I_1$ | 0.02          | -0.11     | 0.07          |
| $I_4-I_1$ | 0.11          | 0.04      | 0.23          |
| $I_5-I_1$ | -0.17         | -0.78     | -0.61         |
| $I_6-I_1$ | -0.10         | -0.63     | -0.45         |
| $I_7-I_1$ | -0.04         | -0.64     | -0.08         |
| $I_8-I_1$ | -0.16         | -0.67     | 0.15          |
| III       |               |           |               |
| $I_2-I_1$ | -0.06         | -0.15     | 0.01          |
| $I_3-I_1$ | -0.08         | -0.19     | -0.03         |
| $I_4-I_1$ | -0.02         | -0.09     | 0.09          |
| $I_5-I_1$ | <b>-0.38</b>  | -0.60     | -0.39         |
| $I_6-I_1$ | <b>-0.40</b>  | -0.61     | -0.39         |
| $I_7-I_1$ | <b>-0.30</b>  | -0.49     | -0.27         |
| $I_8-I_1$ | <b>-0.24</b>  | -0.37     | -0.29         |
| $I_2-I_1$ | -0.25         | -0.85     | -0.54         |
| IV        |               |           |               |
| $I_2-I_1$ | 0.04          | -0.07     | 0.09          |
| $I_3-I_1$ | 0.05          | -0.07     | 0.08          |
| $I_4-I_1$ | 0.08          | -0.01     | 0.18          |
| $I_5-I_1$ | <b>-0.36</b>  | -0.59     | -0.50         |
| $I_6-I_1$ | <b>-0.55</b>  | -1.02     | -0.85         |
| $I_7-I_1$ | <b>-0.43</b>  | -0.83     | -0.61         |
| $I_8-I_1$ | <b>-0.41</b>  | -0.72     | -0.62         |
| $I_9-I_1$ | <b>-0.23</b>  | -0.97     | -0.63         |
| V         |               |           |               |
| $I_2-I_1$ | -0.24         | -0.30     | -0.14         |
| $I_3-I_1$ | -0.26         | -0.29     | 0.19          |
| $I_4-I_1$ | -0.19         | -0.21     | -0.06         |
| $I_5-I_1$ | -0.01         | -0.18     | -0.37         |
| $I_6-I_1$ | -0.14         | -0.18     | -0.01         |
| $I_7-I_1$ | -0.27         | -0.26     | -0.10         |
| $I_8-I_1$ | 0.07          | -0.01     | 0.17          |
| $I_9-I_1$ | -0.15         | -0.70     | -0.53         |

**Table S12**

Equilibrium geometrical parameters of BODIPY II in its  $S_0$  ground state obtained at the CAM-B3LYP/cc-pVTZ level of theory without  $C_{2v}$  point group symmetry constraints in terms of Cartesian coordinates (Å).

| Atom | X         | Y         | Z         |
|------|-----------|-----------|-----------|
| H    | 0.000000  | 2.761008  | 0.000000  |
| C    | 1.212318  | 0.996267  | 0.000000  |
| C    | -1.212318 | 0.996267  | 0.000000  |
| C    | 2.549030  | 1.479014  | 0.000000  |
| C    | -2.549030 | 1.479014  | 0.000000  |
| C    | -3.361516 | 0.354340  | 0.000000  |
| C    | 3.361516  | 0.354340  | 0.000000  |
| C    | -2.527403 | -0.786823 | 0.000000  |
| C    | 2.527403  | -0.786823 | 0.000000  |
| N    | -1.246589 | -0.396015 | 0.000000  |
| N    | 1.246589  | -0.396015 | 0.000000  |
| C    | 0.000000  | 1.669731  | 0.000000  |
| C    | 2.970912  | 2.912704  | 0.000000  |
| C    | -2.970912 | 2.912704  | 0.000000  |
| H    | -4.448857 | 0.334551  | 0.000000  |
| H    | 4.448857  | 0.334551  | 0.000000  |
| C    | -2.917277 | -2.223374 | 0.000000  |
| C    | 2.917277  | -2.223374 | 0.000000  |
| H    | 2.593975  | 3.445617  | 0.886900  |
| H    | -2.593975 | 3.445617  | 0.886900  |
| H    | 2.593975  | 3.445617  | -0.886900 |
| H    | -2.593975 | 3.445617  | -0.886900 |
| H    | 4.065636  | 2.997349  | 0.000000  |
| H    | -4.065636 | 2.997349  | 0.000000  |
| H    | -2.496995 | -2.729462 | 0.881311  |
| H    | 2.496995  | -2.729462 | 0.881311  |
| H    | -2.496995 | -2.729462 | -0.881311 |
| H    | 2.496995  | -2.729462 | -0.881311 |
| H    | 4.008742  | -2.331937 | 0.000000  |
| H    | -4.008742 | -2.331937 | 0.000000  |
| B    | 0.000000  | -1.323170 | 0.000000  |
| F    | 0.000000  | -2.126079 | 1.144240  |
| F    | 0.000000  | -2.126079 | -1.144240 |

**Table S13**

Equilibrium geometrical parameters of BODIPY II in its  $S_1$  excited state obtained at the CAM-B3LYP/cc-pVTZ level of theory without  $C_{2v}$  point group symmetry constraints in terms of Cartesian coordinates (Å).

| Atom | X         | Y         | Z         |
|------|-----------|-----------|-----------|
| H    | 0.000000  | 2.799799  | 0.000000  |
| C    | 1.212003  | 1.003258  | 0.000000  |
| C    | -1.212003 | 1.003258  | 0.000000  |
| C    | 2.564063  | 1.479752  | 0.000000  |
| C    | -2.564063 | 1.479752  | 0.000000  |
| C    | -3.363303 | 0.347051  | 0.000000  |
| C    | 3.363303  | 0.347051  | 0.000000  |
| C    | -2.520761 | -0.796154 | 0.000000  |
| C    | 2.520761  | -0.796154 | 0.000000  |
| N    | -1.234172 | -0.393060 | 0.000000  |
| N    | 1.234172  | -0.393060 | 0.000000  |
| C    | 0.000000  | 1.712000  | 0.000000  |
| C    | 2.963328  | 2.915484  | 0.000000  |
| C    | -2.963328 | 2.915484  | 0.000000  |
| H    | -4.451053 | 0.315450  | 0.000000  |
| H    | 4.451053  | 0.315450  | 0.000000  |
| C    | -2.891471 | -2.230867 | 0.000000  |
| C    | 2.891471  | -2.230867 | 0.000000  |
| H    | 2.573288  | 3.445954  | 0.885540  |
| H    | -2.573288 | 3.445954  | 0.885540  |
| H    | 2.573288  | 3.445954  | -0.885540 |
| H    | -2.573288 | 3.445954  | -0.885540 |
| H    | 4.056346  | 3.021693  | 0.000000  |
| H    | -4.056346 | 3.021693  | 0.000000  |
| H    | -2.456763 | -2.735669 | 0.878574  |
| H    | 2.456763  | -2.735669 | 0.878574  |
| H    | -2.456763 | -2.735669 | -0.878574 |
| H    | 2.456763  | -2.735669 | -0.878574 |
| H    | 3.980852  | -2.358056 | 0.000000  |
| H    | -3.980852 | -2.358056 | 0.000000  |
| B    | 0.000000  | -1.319251 | 0.000000  |
| F    | 0.000000  | -2.133017 | 1.142066  |
| F    | 0.000000  | -2.133017 | -1.142066 |

**Table S14**

Franck-Condon structure of the  $S_0 \rightarrow S_1$  photoabsorption spectrum of BODIPY II: transition energies E (eV), intensities I (a.u.) and assignment of the vibronic states in terms of the quanta of the  $S_1$  vibrational modes computed using CAM-B3LYP/cc-pVTZ results for  $S_0$  and  $S_1$  states.

| Transition                    | E     | I     |
|-------------------------------|-------|-------|
| 0-0                           | 2.841 | 1.000 |
| 14 <sup>1</sup>               | 2.868 | 0.106 |
| 4 <sup>2</sup>                | 2.869 | 0.186 |
| 5 <sup>2</sup>                | 2.869 | 0.190 |
| 4 <sup>4</sup>                | 2.897 | 0.052 |
| 5 <sup>2</sup> 4 <sup>2</sup> | 2.898 | 0.035 |
| 5 <sup>4</sup>                | 2.898 | 0.054 |
| 24 <sup>1</sup>               | 2.902 | 0.076 |
| 27 <sup>1</sup>               | 2.914 | 0.038 |
| 30 <sup>1</sup>               | 2.926 | 0.038 |
| 39 <sup>1</sup>               | 2.957 | 0.057 |
| 55 <sup>1</sup>               | 2.992 | 0.044 |
| 58 <sup>1</sup>               | 3.006 | 0.056 |

**Table S15**

Franck-Condon structure of the  $S_1 \rightarrow S_0$  photoemission spectrum of BODIPY II: transition energies E (eV), intensities I (a.u.) and assignment of the vibronic states in terms of the quanta of the  $S_0$  vibrational modes computed using CAM-B3LYP/cc-pVTZ results for  $S_0$  and  $S_1$  states.

| Transition                    | E     | I     |
|-------------------------------|-------|-------|
| 70 <sup>1</sup>               | 2.657 | 0.029 |
| 55 <sup>1</sup>               | 2.686 | 0.050 |
| 38 <sup>1</sup>               | 2.723 | 0.049 |
| 31 <sup>1</sup>               | 2.754 | 0.031 |
| 26 <sup>1</sup>               | 2.767 | 0.035 |
| 24 <sup>1</sup>               | 2.778 | 0.064 |
| 13 <sup>1</sup>               | 2.813 | 0.098 |
| 2 <sup>4</sup>                | 2.829 | 0.068 |
| 2 <sup>2</sup> 1 <sup>2</sup> | 2.829 | 0.044 |
| 1 <sup>4</sup>                | 2.829 | 0.065 |
| 2 <sup>2</sup>                | 2.835 | 0.212 |
| 1 <sup>2</sup>                | 2.835 | 0.208 |
| 0-0                           | 2.841 | 1.000 |

**Table S16**

Harmonic frequencies  $\omega$  ( $\text{cm}^{-1}$ ) of the vibrational normal modes of BODIPY II in its  $S_0$  ground state and  $S_1$  excited state obtained at the CAM-B3LYP/cc-pVTZ level of theory.

| $S_0$           |                   |          | $S_1$            |                   |          |
|-----------------|-------------------|----------|------------------|-------------------|----------|
| Mode            | Assignment        | $\omega$ | Mode             | Assignment        | $\omega$ |
| v <sub>1</sub>  | 1 a <sub>2</sub>  | 23.5     | v' <sub>1</sub>  | 1 b <sub>1</sub>  | 43.7     |
| v <sub>2</sub>  | 1 b <sub>1</sub>  | 23.9     | v' <sub>2</sub>  | 1 a <sub>2</sub>  | 62.9     |
| v <sub>3</sub>  | 2 b <sub>1</sub>  | 43.2     | v' <sub>3</sub>  | 2 b <sub>1</sub>  | 84.9     |
| v <sub>4</sub>  | 2 a <sub>2</sub>  | 69.9     | v' <sub>4</sub>  | 2 a <sub>2</sub>  | 114.6    |
| v <sub>5</sub>  | 3 b <sub>1</sub>  | 93.7     | v' <sub>5</sub>  | 3 b <sub>1</sub>  | 115.6    |
| v <sub>6</sub>  | 3 a <sub>2</sub>  | 107.6    | v' <sub>6</sub>  | 3 a <sub>2</sub>  | 138.3    |
| v <sub>7</sub>  | 4 b <sub>1</sub>  | 109.7    | v' <sub>7</sub>  | 4 b <sub>1</sub>  | 145.3    |
| v <sub>8</sub>  | 1 a <sub>1</sub>  | 150.2    | v' <sub>8</sub>  | 1 a <sub>1</sub>  | 149.3    |
| v <sub>9</sub>  | 4 a <sub>2</sub>  | 150.6    | v' <sub>9</sub>  | 4 a <sub>2</sub>  | 156.0    |
| v <sub>10</sub> | 5 a <sub>2</sub>  | 203.5    | v' <sub>10</sub> | 5 b <sub>1</sub>  | 197.9    |
| v <sub>11</sub> | 5 b <sub>1</sub>  | 204.5    | v' <sub>11</sub> | 5 a <sub>2</sub>  | 200.8    |
| v <sub>12</sub> | 1 b <sub>2</sub>  | 207.5    | v' <sub>12</sub> | 1 b <sub>2</sub>  | 208.2    |
| v <sub>13</sub> | 2 a <sub>1</sub>  | 223.9    | v' <sub>13</sub> | 6 b <sub>1</sub>  | 216.9    |
| v <sub>14</sub> | 6 b <sub>1</sub>  | 252.1    | v' <sub>14</sub> | 2 a <sub>1</sub>  | 221.5    |
| v <sub>15</sub> | 2 b <sub>2</sub>  | 256.8    | v' <sub>15</sub> | 2 b <sub>2</sub>  | 252.7    |
| v <sub>16</sub> | 3 a <sub>1</sub>  | 302.5    | v' <sub>16</sub> | 3 a <sub>1</sub>  | 299.6    |
| v <sub>17</sub> | 3 b <sub>2</sub>  | 316.1    | v' <sub>17</sub> | 3 b <sub>2</sub>  | 315.2    |
| v <sub>18</sub> | 6 a <sub>2</sub>  | 321.5    | v' <sub>18</sub> | 6 a <sub>2</sub>  | 325.3    |
| v <sub>19</sub> | 7 a <sub>2</sub>  | 385.8    | v' <sub>19</sub> | 7 a <sub>2</sub>  | 357.2    |
| v <sub>20</sub> | 4 a <sub>1</sub>  | 426.1    | v' <sub>20</sub> | 7 b <sub>1</sub>  | 379.9    |
| v <sub>21</sub> | 7 b <sub>1</sub>  | 469.1    | v' <sub>21</sub> | 4 a <sub>1</sub>  | 417.0    |
| v <sub>22</sub> | 4 b <sub>2</sub>  | 485.4    | v' <sub>22</sub> | 8 b <sub>1</sub>  | 466.6    |
| v <sub>23</sub> | 8 b <sub>1</sub>  | 496.8    | v' <sub>23</sub> | 4 b <sub>2</sub>  | 484.8    |
| v <sub>24</sub> | 5 a <sub>1</sub>  | 501.3    | v' <sub>24</sub> | 5 a <sub>1</sub>  | 494.0    |
| v <sub>25</sub> | 5 b <sub>2</sub>  | 593.1    | v' <sub>25</sub> | 6 a <sub>1</sub>  | 576.0    |
| v <sub>26</sub> | 6 a <sub>1</sub>  | 593.3    | v' <sub>26</sub> | 5 b <sub>2</sub>  | 580.3    |
| v <sub>27</sub> | 7 a <sub>1</sub>  | 604.8    | v' <sub>27</sub> | 7 a <sub>1</sub>  | 594.8    |
| v <sub>28</sub> | 9 b <sub>1</sub>  | 668.9    | v' <sub>28</sub> | 9 b <sub>1</sub>  | 633.3    |
| v <sub>29</sub> | 8 a <sub>2</sub>  | 674.5    | v' <sub>29</sub> | 8 a <sub>2</sub>  | 645.4    |
| v <sub>30</sub> | 6 b <sub>2</sub>  | 689.8    | v' <sub>30</sub> | 8 a <sub>1</sub>  | 690.7    |
| v <sub>31</sub> | 8 a <sub>1</sub>  | 701.7    | v' <sub>31</sub> | 6 b <sub>2</sub>  | 694.8    |
| v <sub>32</sub> | 9 a <sub>2</sub>  | 712.8    | v' <sub>32</sub> | 10 b <sub>1</sub> | 697.0    |
| v <sub>33</sub> | 10 b <sub>1</sub> | 752.5    | v' <sub>33</sub> | 9 a <sub>2</sub>  | 698.6    |
| v <sub>34</sub> | 10 a <sub>2</sub> | 834.0    | v' <sub>34</sub> | 11 b <sub>1</sub> | 769.0    |
| v <sub>35</sub> | 11 b <sub>1</sub> | 835.4    | v' <sub>35</sub> | 12 b <sub>1</sub> | 830.4    |

|                 |    |                |        |                  |    |                |        |
|-----------------|----|----------------|--------|------------------|----|----------------|--------|
| v <sub>36</sub> | 7  | b <sub>2</sub> | 850.1  | v' <sub>36</sub> | 10 | a <sub>2</sub> | 834.0  |
| v <sub>37</sub> | 8  | b <sub>2</sub> | 902.5  | v' <sub>37</sub> | 7  | b <sub>2</sub> | 865.6  |
| v <sub>38</sub> | 9  | a <sub>1</sub> | 944.1  | v' <sub>38</sub> | 8  | b <sub>2</sub> | 875.4  |
| v <sub>39</sub> | 12 | b <sub>1</sub> | 957.5  | v' <sub>39</sub> | 9  | a <sub>1</sub> | 939.2  |
| v <sub>40</sub> | 9  | b <sub>2</sub> | 993.0  | v' <sub>40</sub> | 10 | a <sub>1</sub> | 984.8  |
| v <sub>41</sub> | 10 | a <sub>1</sub> | 995.6  | v' <sub>41</sub> | 9  | b <sub>2</sub> | 991.7  |
| v <sub>42</sub> | 11 | a <sub>1</sub> | 1003.9 | v' <sub>42</sub> | 11 | a <sub>1</sub> | 998.9  |
| v <sub>43</sub> | 10 | b <sub>2</sub> | 1008.6 | v' <sub>43</sub> | 10 | b <sub>2</sub> | 1003.0 |
| v <sub>44</sub> | 11 | a <sub>2</sub> | 1052.6 | v' <sub>44</sub> | 13 | b <sub>1</sub> | 1042.1 |
| v <sub>45</sub> | 13 | b <sub>1</sub> | 1054.5 | v' <sub>45</sub> | 11 | a <sub>2</sub> | 1045.1 |
| v <sub>46</sub> | 14 | b <sub>1</sub> | 1058.5 | v' <sub>46</sub> | 12 | a <sub>2</sub> | 1047.8 |
| v <sub>47</sub> | 12 | a <sub>2</sub> | 1058.8 | v' <sub>47</sub> | 14 | b <sub>1</sub> | 1047.9 |
| v <sub>48</sub> | 12 | a <sub>1</sub> | 1090.1 | v' <sub>48</sub> | 12 | a <sub>1</sub> | 1080.5 |
| v <sub>49</sub> | 11 | b <sub>2</sub> | 1126.7 | v' <sub>49</sub> | 11 | b <sub>2</sub> | 1082.5 |
| v <sub>50</sub> | 13 | a <sub>1</sub> | 1132.7 | v' <sub>50</sub> | 13 | a <sub>1</sub> | 1095.1 |
| v <sub>51</sub> | 15 | b <sub>1</sub> | 1147.9 | v' <sub>51</sub> | 15 | b <sub>1</sub> | 1124.7 |
| v <sub>52</sub> | 12 | b <sub>2</sub> | 1179.5 | v' <sub>52</sub> | 12 | b <sub>2</sub> | 1177.7 |
| v <sub>53</sub> | 14 | a <sub>1</sub> | 1189.5 | v' <sub>53</sub> | 14 | a <sub>1</sub> | 1183.0 |
| v <sub>54</sub> | 13 | b <sub>2</sub> | 1210.8 | v' <sub>54</sub> | 13 | b <sub>2</sub> | 1199.5 |
| v <sub>55</sub> | 15 | a <sub>1</sub> | 1243.8 | v' <sub>55</sub> | 15 | a <sub>1</sub> | 1218.1 |
| v <sub>56</sub> | 14 | b <sub>2</sub> | 1262.2 | v' <sub>56</sub> | 14 | b <sub>2</sub> | 1265.2 |
| v <sub>57</sub> | 15 | b <sub>2</sub> | 1396.0 | v' <sub>57</sub> | 15 | b <sub>2</sub> | 1329.6 |
| v <sub>58</sub> | 16 | a <sub>1</sub> | 1398.6 | v' <sub>58</sub> | 16 | a <sub>1</sub> | 1334.9 |
| v <sub>59</sub> | 16 | b <sub>2</sub> | 1400.9 | v' <sub>59</sub> | 16 | b <sub>2</sub> | 1389.9 |
| v <sub>60</sub> | 17 | a <sub>1</sub> | 1404.7 | v' <sub>60</sub> | 17 | a <sub>1</sub> | 1392.5 |
| v <sub>61</sub> | 17 | b <sub>2</sub> | 1417.4 | v' <sub>61</sub> | 17 | b <sub>2</sub> | 1403.9 |
| v <sub>62</sub> | 18 | a <sub>1</sub> | 1430.5 | v' <sub>62</sub> | 18 | a <sub>1</sub> | 1404.7 |
| v <sub>63</sub> | 18 | b <sub>2</sub> | 1433.6 | v' <sub>63</sub> | 18 | b <sub>2</sub> | 1418.2 |
| v <sub>64</sub> | 13 | a <sub>2</sub> | 1445.5 | v' <sub>64</sub> | 13 | a <sub>2</sub> | 1431.8 |
| v <sub>65</sub> | 16 | b <sub>1</sub> | 1447.8 | v' <sub>65</sub> | 16 | b <sub>1</sub> | 1433.9 |
| v <sub>66</sub> | 19 | a <sub>1</sub> | 1456.4 | v' <sub>66</sub> | 19 | b <sub>2</sub> | 1437.4 |
| v <sub>67</sub> | 14 | a <sub>2</sub> | 1462.3 | v' <sub>67</sub> | 19 | a <sub>1</sub> | 1444.7 |
| v <sub>68</sub> | 17 | b <sub>1</sub> | 1462.6 | v' <sub>68</sub> | 14 | a <sub>2</sub> | 1453.1 |
| v <sub>69</sub> | 19 | b <sub>2</sub> | 1473.6 | v' <sub>69</sub> | 17 | b <sub>1</sub> | 1453.5 |
| v <sub>70</sub> | 20 | a <sub>1</sub> | 1476.2 | v' <sub>70</sub> | 20 | a <sub>1</sub> | 1456.3 |
| v <sub>71</sub> | 20 | b <sub>2</sub> | 1480.5 | v' <sub>71</sub> | 20 | b <sub>2</sub> | 1459.7 |
| v <sub>72</sub> | 21 | a <sub>1</sub> | 1516.2 | v' <sub>72</sub> | 21 | b <sub>2</sub> | 1485.9 |
| v <sub>73</sub> | 21 | b <sub>2</sub> | 1527.8 | v' <sub>73</sub> | 21 | a <sub>1</sub> | 1507.2 |
| v <sub>74</sub> | 22 | a <sub>1</sub> | 1531.6 | v' <sub>74</sub> | 22 | a <sub>1</sub> | 1518.0 |



|                 |    |                |        |                  |    |                |        |
|-----------------|----|----------------|--------|------------------|----|----------------|--------|
| v <sub>75</sub> | 22 | b <sub>2</sub> | 1604.7 | v' <sub>75</sub> | 22 | b <sub>2</sub> | 1523.8 |
| v <sub>76</sub> | 23 | a <sub>1</sub> | 1608.5 | v' <sub>76</sub> | 23 | a <sub>1</sub> | 1525.1 |
| v <sub>77</sub> | 24 | a <sub>1</sub> | 1621.3 | v' <sub>77</sub> | 23 | b <sub>2</sub> | 1600.1 |
| v <sub>78</sub> | 23 | b <sub>2</sub> | 1681.2 | v' <sub>78</sub> | 24 | a <sub>1</sub> | 1605.9 |
| v <sub>79</sub> | 24 | b <sub>2</sub> | 3057.6 | v' <sub>79</sub> | 24 | b <sub>2</sub> | 3033.1 |
| v <sub>80</sub> | 25 | a <sub>1</sub> | 3057.9 | v' <sub>80</sub> | 25 | a <sub>1</sub> | 3033.8 |
| v <sub>81</sub> | 25 | b <sub>2</sub> | 3072.9 | v' <sub>81</sub> | 26 | a <sub>1</sub> | 3047.1 |
| v <sub>82</sub> | 26 | a <sub>1</sub> | 3073.2 | v' <sub>82</sub> | 25 | b <sub>2</sub> | 3047.5 |
| v <sub>83</sub> | 15 | a <sub>2</sub> | 3120.2 | v' <sub>83</sub> | 18 | b <sub>1</sub> | 3085.5 |
| v <sub>84</sub> | 18 | b <sub>1</sub> | 3120.4 | v' <sub>84</sub> | 15 | a <sub>2</sub> | 3086.0 |
| v <sub>85</sub> | 16 | a <sub>2</sub> | 3145.5 | v' <sub>85</sub> | 19 | b <sub>1</sub> | 3104.4 |
| v <sub>86</sub> | 19 | b <sub>1</sub> | 3146.1 | v' <sub>86</sub> | 16 | a <sub>2</sub> | 3106.2 |
| v <sub>87</sub> | 26 | b <sub>2</sub> | 3152.7 | v' <sub>87</sub> | 26 | b <sub>2</sub> | 3147.3 |
| v <sub>88</sub> | 27 | a <sub>1</sub> | 3152.8 | v' <sub>88</sub> | 27 | a <sub>1</sub> | 3147.4 |
| v <sub>89</sub> | 27 | b <sub>2</sub> | 3173.0 | v' <sub>89</sub> | 27 | b <sub>2</sub> | 3167.7 |
| v <sub>90</sub> | 28 | a <sub>1</sub> | 3173.2 | v' <sub>90</sub> | 28 | a <sub>1</sub> | 3167.8 |
| v <sub>91</sub> | 29 | a <sub>1</sub> | 3222.6 | v' <sub>91</sub> | 29 | a <sub>1</sub> | 3252.6 |
| v <sub>92</sub> | 28 | b <sub>2</sub> | 3258.7 | v' <sub>92</sub> | 28 | b <sub>2</sub> | 3253.2 |
| v <sub>93</sub> | 30 | a <sub>1</sub> | 3258.8 | v' <sub>93</sub> | 30 | a <sub>1</sub> | 3253.3 |

## References

81 I.J. Arroyo, R. Hu, G. Merino, B.Z. Tang, E. Peña-Cabrera, The Smallest and One of the Brightest. Efficient Preparation and Optical Description of the Parent Borondipyrromethene System, *J. Org. Chem.*, 2009, **74**, 5719–5722. DOI: 10.1021/jo901014w

86 J.J. Yeh, I. Lindau, Atomic subshell photoionization cross sections and asymmetry parameters:  $1 \leq Z \leq 103$ , *Atom. Data Nucl. Data*, 1985, **32**, 1–155. DOI: 10.1016/0092-640X(85)90016-6
